# Supplementary material for: Air-dried, high-density graphene hybrid aerogels for phase change composites with exceptional thermal conductivity and shape stability
Source: Royal Society of Chemistry journal article supplement (doi:10.1039/c6ta07869a), 2016-01-01
Supplement: c6ta07869a1.pdf [file c6ta07869a1.pdf]

**Air-dried, high-density graphene hybrid aerogels for phase change composites with exceptional thermal conductivity and shape stability**

Jing Yang<sup>a</sup>, Xiaofeng Li<sup>a\*</sup>, Shuang Han<sup>a</sup>, Yiting Zhang<sup>a</sup>, Peng Min<sup>a,b</sup>, Nikhil Koratkar<sup>c\*</sup> and Zhong-Zhen Yu<sup>a,b\*</sup>

<sup>a</sup> State Key Laboratory of Organic-Inorganic Composites, College of Materials Science and Engineering, Beijing University of Chemical Technology, Beijing 100029, China. \*E-mail: xfli@mail.buct.edu.cn (X. Li), yuzz@mail.buct.edu.cn (Z.-Z. Yu)

<sup>b</sup> Beijing Advanced Innovation Center for Soft Matter Science and Engineering, Beijing University of Chemical Technology, Beijing 100029, China

<sup>c</sup> Department of Mechanical, Aerospace and Nuclear Engineering, Rensselaer Polytechnic Institute, 110 Eighth Street, Troy, New York 12180-3590. \*E-mail: koratn@rpi.edu (N. Koratkar)

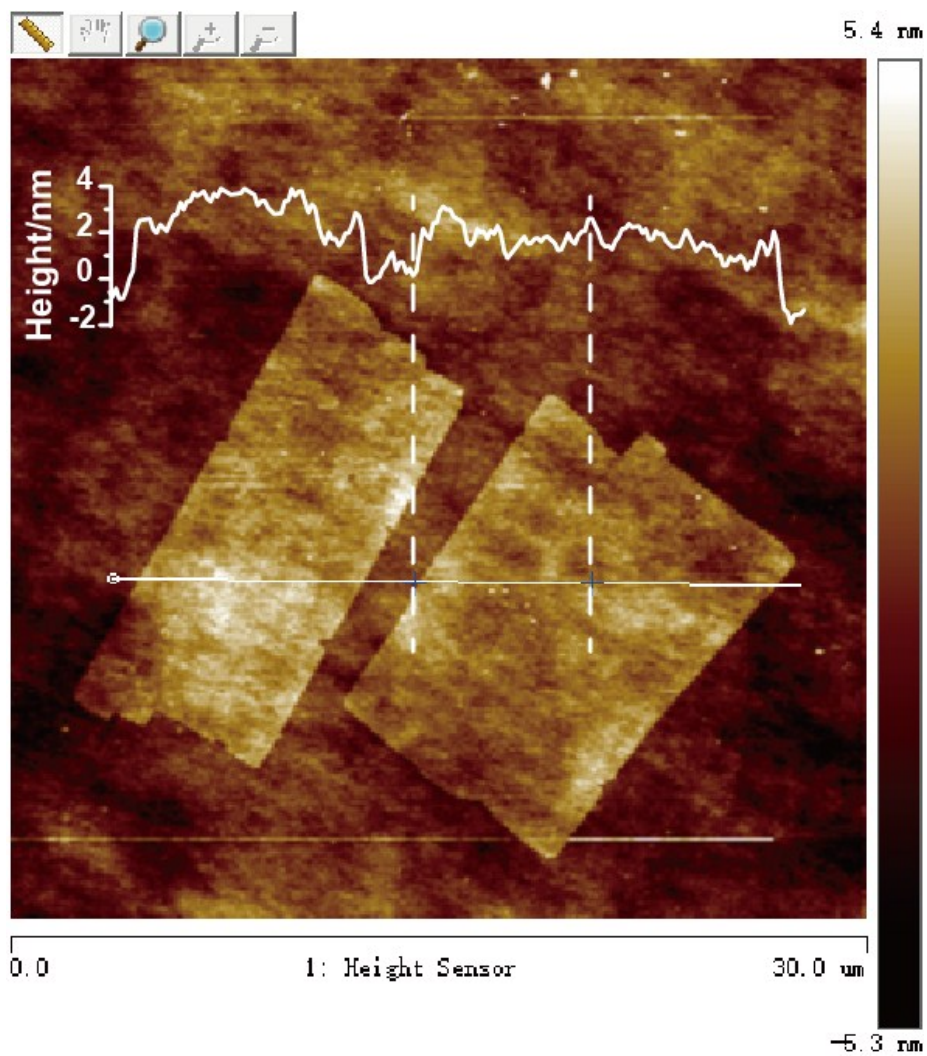

**Fig. S1.** AFM image of GNPs.

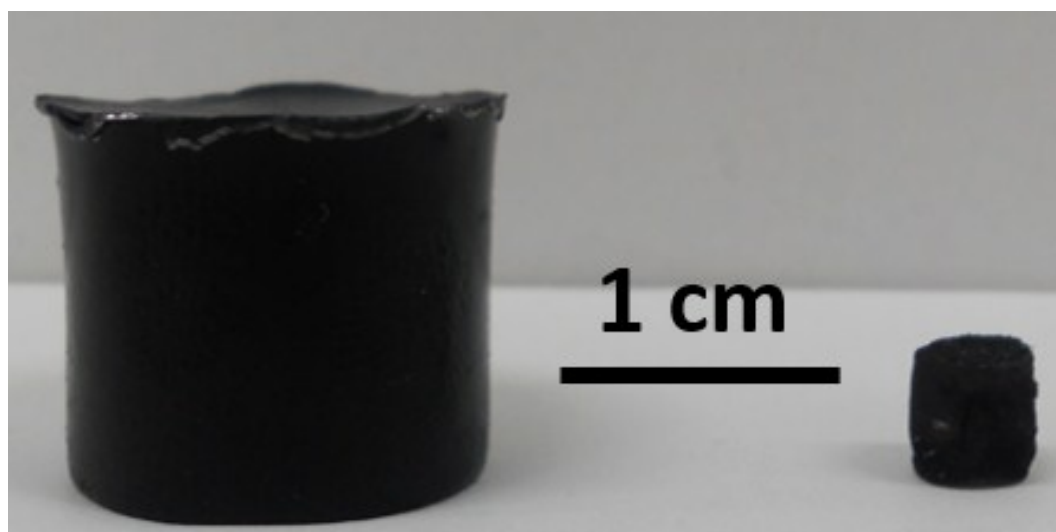

**Fig. S2.** Digital images of RGO monolith before and after ambient drying.

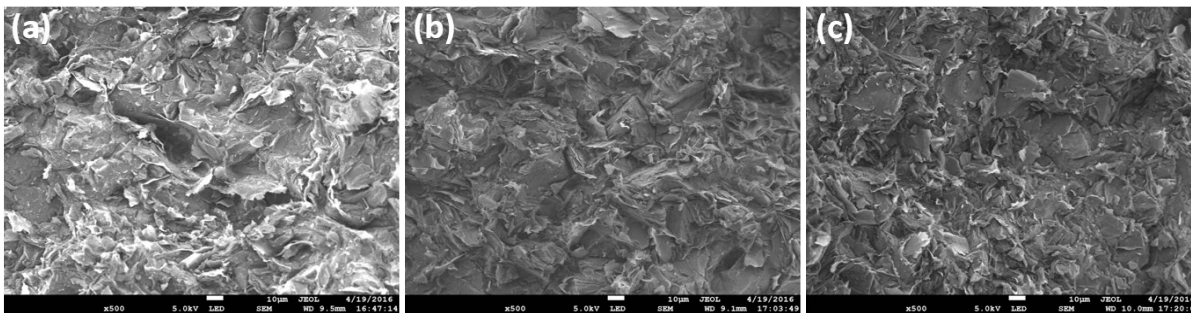

**Fig. S3** SEM images of ORG composites of (a) ORG-5, (b) ORG-10, and (c) ORG-15.

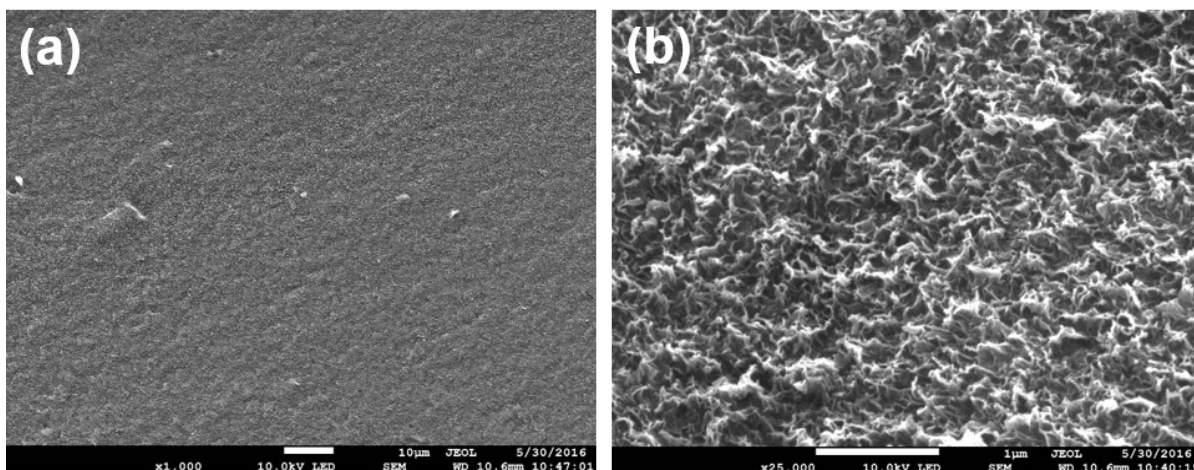

**Fig. S4.** (a) Low and (b) high magnification SEM images of RGO monolith prepared by ambient drying.

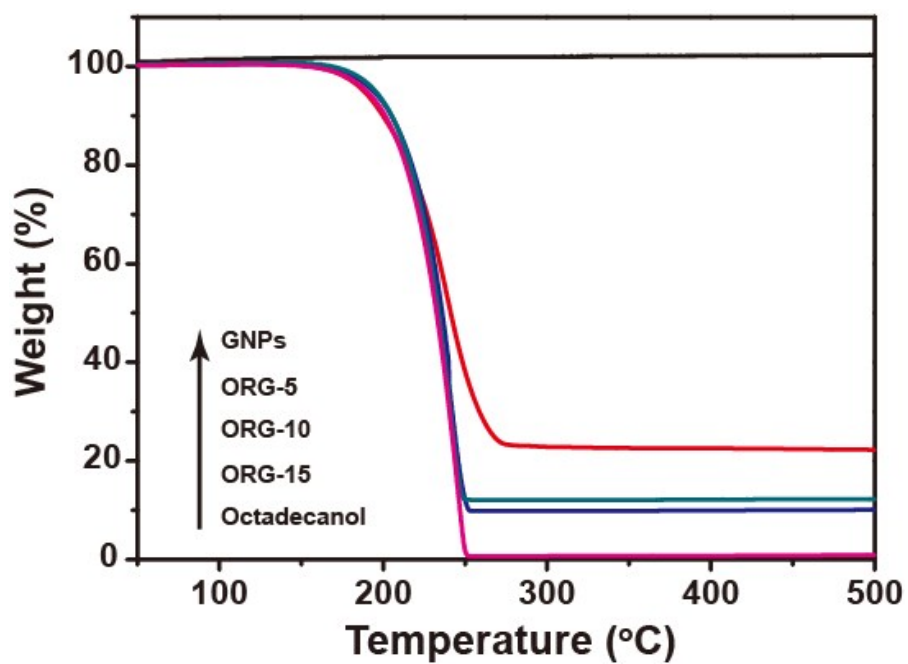

**Fig. S5.** TGA curves of 1-ctadecanol and ORG composites.

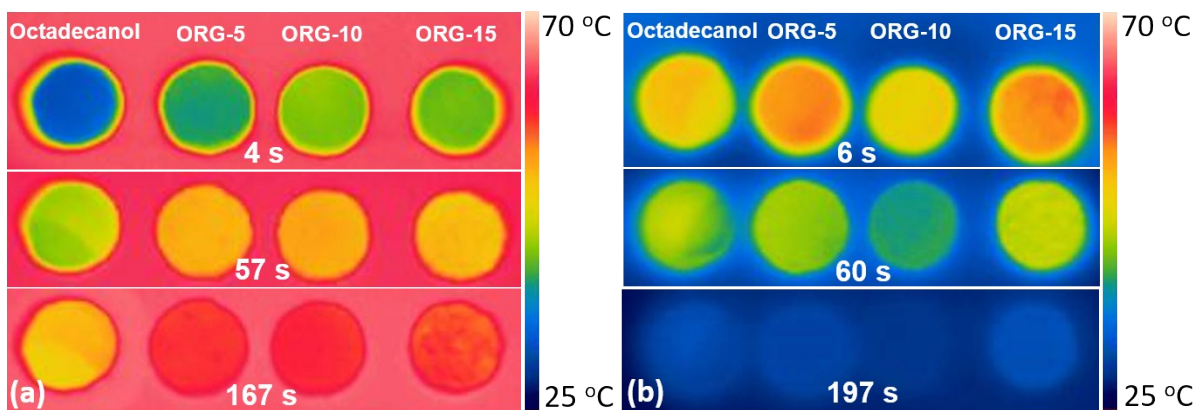

**Fig. S6.** Infrared camera images of 1-octadecanol and ORG composites: (a) heating process; (b) cooling process. All ORG composites show faster thermal responses than neat 1-octadecanol, and the ORG-10 composite shows the fastest thermal response. For example, after heated for 167 s, ORG-10 composite shows the highest temperature ( $\sim 59.5$  °C) and the 1-octadecanol shows the lowest temperature ( $\sim 53.2$  °C). Then, these ORG composites and 1-octadecanol were immediately transferred to a stainless steel plate to cool down. 1-octadecanol has a low temperature at 6s because of its lowest ending temperature in the heating process. At 197s, the ORG-10 composites show the lowest temperature due to their high thermal conductivities.

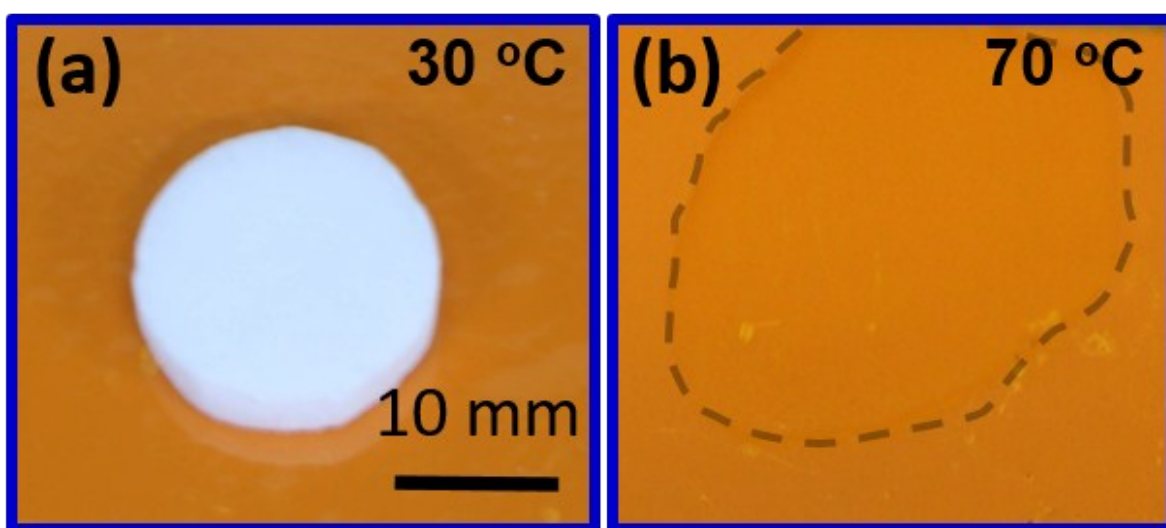

**Fig. S7.** Digital images of neat 1-octadecanol at (a) 30 °C and (b) 70 °C.

**Table S1.** Comparisons of thermal conductivities of the phase change composites with their counterparts reported in the literature.

| Filler                       | Matrix                     | Content (wt%) | Thermal conductivity ( $\text{W m}^{-1} \text{K}^{-1}$ ) | Ref.      |
|------------------------------|----------------------------|---------------|----------------------------------------------------------|-----------|
| RGO/GNP-10                   | 1-Octadecanol              | 12            | 5.92                                                     | This work |
| RGO/GNP-15                   | 1-Octadecanol              | 10.3          | 4.61                                                     | This work |
| Annealed graphene at 2200 °C | 1-Octadecanol              | 10            | 3.55                                                     | 1         |
| Expanded graphite            | Paraffin                   | 10            | 2.7                                                      | 2         |
| Graphene                     |                            | 10            | 0.5                                                      |           |
| Graphene                     | Octadecanoic acid          | 15            | 2.635                                                    | 3         |
| Expanded graphite            | Paraffin                   | 10            | 0.82                                                     | 4         |
| Graphite                     | Epoxy                      | 10            | 0.54                                                     | 5         |
| Graphene nanoplatelets       | Paraffin                   | 10            | 2.0                                                      | 6         |
| Graphene nanoplatelets       | Polyphenylene sulfide      | 23.9          | 4.41                                                     | 7         |
| Silica coated graphite       | Polybutylene terephthalate | 22.69 vol%    | 3.3                                                      | 8         |
|                              |                            | 40            | 6.55                                                     |           |
| Graphene nanoplatelets       | Epoxy                      | 30            | 4.42                                                     | 9         |
|                              |                            | 20            | 2.76                                                     |           |
|                              |                            | 10            | 1.39                                                     |           |
| RGO sheets                   | Nylon 6                    | 10            | 0.42                                                     | 10        |
| Graphite foam                | Paraffin                   | 4             | 3.54                                                     | 11        |

**Table S2.** BET surface areas and BJH adsorption pore volumes of the hybrid aerogels.

| Samples    | BET surface Area ( $\text{m}^2 \text{g}^{-1}$ ) | BJH adsorption pore volume ( $\text{cm}^3 \text{g}^{-1}$ ) |
|------------|-------------------------------------------------|------------------------------------------------------------|
| RGO/GNP-5  | 32.8                                            | 0.12                                                       |
| RGO/GNP-10 | 27.8                                            | 0.12                                                       |
| RGO/GNP-15 | 23.7                                            | 0.11                                                       |

## References

- [1] G. Xin, H. Sun, S. M. Scott, T. Yao, F. Lu, D. Shao, T. Hu, G. Wang, G. Ran, J. Lian, *ACS Appl. Mater. Interfaces*, 2014, **6**, 15262.
- [2] J. N. Shi, M. D. Ger, Y. M. Liu, Y. C. Fan, N. T. Wen, C. K. Lin, N. W. Pu, *Carbon*, 2013, **51**, 365.

- [3] Y. Zhong, M. Zhou, F. Huang, T. Lin, D. Wan, *Sol. Energy Mater. Sol. Cells*, 2013, **113**, 195.
- [4] A. Sarı, A. Karaipekli, *Appl. Therm. Eng.*, 2007, **27**, 1271.
- [5] D. Tang, J. Su, Q. Yang, M. Kong, Z. Zhao, Y. Huang, X. Liao, Y. Liu, *RSC Adv.*, 2015, **5**, 55170.
- [6] X. Fang, L. W. Fan, Q. Ding, X. Wang, X. L. Yao, J. F. Hou, Z. T. Yu, G. H. Cheng, Y. C. Hu, K. F. Cen, *Energy Fuels*, 2013, **27**, 4041.
- [7] J. Gu, C. Xie, H. Li, J. Dang, W. Geng, Q. Zhang, *Polym. Compos.* **2013**, *35*, 1087.
- [8] Y. Noma, Y. Saga, N. Une, *Carbon*, 2014, **78**, 204.
- [9] A. Yu, P. Ramesh, X. Sun, E. Bekyarova, M. E. Itkis, R. C. Haddon, *Adv. Mater.*, 2008, **20**, 4740.
- [10] P. Ding, S. Su, N. Song, S. Tang, Y. Liu, L. Shi, *Carbon*, 2014, **66**, 576.
- [11] H. Ji, D. P. Sellan, M. T. Pettes, X. Kong, J. Ji, L. Shi, R. S. Ruoff, *Energy Environ. Sci.*, 2014, **7**, 1185.
